# Supplementary material for: Cost Sharing and Hereditary Cancer Risk: Predictors of Willingness‐to‐Pay for Genetic Testing
Source: Springer Nature journal article supplement (doi:10.1007/s10897-014-9724-5), 2014-05-04
Supplement: MOESM1 [file 8916342]

Supplemental Table 1: Descriptive statistics for psychosocial scales

|  |  | **Mean** | **Median** |  |
| --- | --- | --- | --- | --- |
|  | **N** | **(Std Dev)** | **(Min,Max)** | **Percent** |
|  |  |  |  |  |
| **Benefits to CRC screening** | 374 | 31.1 (3.3) | 31.5 (21,35) |  |
| **Barriers to CRC screening** | 371 | 21.4 (5.9) | 21 (11,39) |  |
| **Reasons for wanting GT** | 385 | 6.0 (2.0) | 6 (0,11) |  |
| **Reasons for not wanting GT** | 385 | 1.3 (1.7) | 1 (0,11) |  |
| **Knowledge, genetic risk & CRC** | 381 | 6.5 (2.1) | 7 (0,12) |  |
| **Perceived control of GI ca risk** | 374 | 2.6 (1.0) | 3 (1,4) |  |
| **Reasons for Not Screening** |  |  |  |  |
| 0 | 202 |  |  | 52.5 |
| 1 | 114 |  |  | 29.6 |
| 2+ | 69 |  |  | 17.9 |
| **Worry about developing a GI cancer** | |  |  |  |
| Never | 110 |  |  | 29.3 |
| Sometimes | 151 |  |  | 40.3 |
| Often | 71 |  |  | 18.9 |
| A lot | 43 |  |  | 11.5 |
| **Worry affects your mood** |  |  |  |  |
| Never | 234 |  |  | 62.9 |
| Sometimes | 99 |  |  | 26.6 |
| Often | 25 |  |  | 6.7 |
| A lot | 14 |  |  | 3.8 |
